# Supplementary material for: Cerebellar-Prefrontal Network Connectivity and Negative Symptoms in Schizophrenia
Source: Atypon-hosted journal article supplement (doi:10.1176/appi.ajp.2018.18040429), 2019-01-30
Supplement: appi.ajp.2018.18040429.ds001.pdf [file appi.ajp.2018.18040429.ds001.pdf]

 


Psychiatry Online
